# Supplementary material for: An Effective Screening Method and a Reliable Screening Trait for Salt Tolerance of Brassica napus at the Germination Stage
Source: Front Plant Sci. 2019 Apr 26;10:530. doi: 10.3389/fpls.2019.00530 (PMC6499083; doi:10.3389/fpls.2019.00530)
Supplement: Supplementary file 1 [file Table_1.XLS]

## Sheet: Sheet1
	Table S1 Effect of NaCl treatment on germination parameters of 15 Brassica napus inbred lines
No. of inbred lines	Germination rate (%)						Fresh weight of shoot part (mg/plant)						Fresh weight of roots (mg/plant)						Shoot length (cm/plant)						Root length (cm/plant)						Total fresh weight (mg/plant)
	NaCl levels(mmol/ L)
	0	50	100	150	200	250	0	50	100	150	200	250	0	50	100	150	200	250	0	50	100	150	200	250	0	50	100	150	200	250	0	50	100	150	200	250
1	100.000 ± 0.000	87.500 ± 5.893	66.667 ± 11.785	29.167 ± 5.893	0.000 ± 0.000	0.000 ± 0.000	2.715 ± 1.266	8.715 ± 5.947	9.735 ± 6.852	0.000 ± 0.000	0.000 ± 0.000	0.000 ± 0.000	5.100 ± 2.121	2.220 ± 1.697	3.125 ± 2.355	0.000 ± 0.000	0.000 ± 0.000	0.000 ± 0.000	2.8 ± 0.5656	1.180 ± 0.588	1.400 ± 0.356	0.000 ± 0.000	0.000 ± 0.000	0.000 ± 0.000	6.350 ± 1.343	3.180 ± 1.789	4.070 ± 2.359	0.000 ± 0.000	0.000 ± 0.000	0.000 ± 0.000	7.815 ± 0.856	10.935 ± 4.250	12.860 ± 4.497	0.000 ± 0.000	0.000 ± 0.000	0.000 ± 0.000
51	100.000 ± 0.000	87.500 ± 17.678	87.500 ± 5.893	29.167 ± 5.893	8.333 ± 0.000	0.000 ± 0.000	39.700 ± 7.212	101.250 ± 20.294	36.513 ± 5.922	23.117 ± 0.401	11.800 ± 0.990	0.000 ± 0.000	13.663 ± 2.457	8.410 ± 1.259	6.250 ± 0.495	3.817 ± 1.296	2.567 ± 0.236	0.000 ± 0.000	2.750 ± 0.453	2.220 ± 0.295	2.750 ± 0.129	1.400 ± 0.2	1.000 ± 0.173	0.000 ± 0.000	3.530 ± 1.668	6.200 ± 0.97	7.725 ± 0.922	2.1 ± 0.872	0.9333 ± 0.153	0.000 ± 0.000	53.363 ± 9.670	109.660 ± 19.035	42.763 ± 5.427	26.933 ± 0.896	14.367 ± 1.226	0.000 ± 0.000
101	95.833 ± 5.893	91.667 ± 11.785	100.000 ± 0.000	87.500 ± 17.678	66.667 ± 11.785	50.000 ± 11.785	26.167 ± 19.583	32.545 ± 32.944	23.555 ± 11.844	8.830 ± 3.564	0.000 ± 0.000	0.000 ± 0.000	6.039 ± 3.420	7.690 ± 4.568	6.140 ± 1.216	1.525 ± 0.163	0.000 ± 0.000	0.000 ± 0.000	1.820 ± 0.507	1.720 ± 0.274	1.520 ± 0.503	1.090 ± 0.137	0.000 ± 0.000	0.000 ± 0.000	2.710 ± 0.511	6.610 ± 1.220	8.060 ± 1.335	3.120 ± 0.551	0.000 ± 0.000	0.000 ± 0.000	32.206 ± 16.162	40.235 ± 28.376	29.695 ± 13.060	10.355 ± 3.401	0.000 ± 0.000	0.000 ± 0.000
151	100.000 ± 0.000	100.000 ± 0.000	100.000 ± 0.000	87.500 ± 17.678	95.833 ± 5.893	25.000 ± 11.785	13.790 ± 2.843	14.910 ± 1.061	14.725 ± 0.163	12.460 ± 0.198	7.090 ± 0.891	0.000 ± 0.000	5.750 ± 0.297	5.430 ± 0.750	5.445 ± 0.643	1.560 ± 0.113	1.505 ± 0.035	0.000 ± 0.000	2.900 ± 0.302	2.260 ± 0.350	2.170 ± 0.267	1.280 ± 0.155	0.810 ± 0.120	0.000 ± 0.000	5.320 ± 1.951	5.730 ± 2.344	9.030 ± 1.702	5.190 ± 1.376	1.170 ± 0.258	0.000 ± 0.000	19.540 ± 3.140	20.340 ± 1.810	20.170 ± 0.481	14.020 ± 0.085	8.595 ± 0.856	0.000 ± 0.000
201	100.000 ± 0.000	100.000 ± 0.000	95.833 ± 5.893	95.833 ± 5.893	37.500 ± 5.893	8.333 ± 11.785	8.695 ± 0.318	17.830 ± 0.410	11.885 ± 5.508	9.345 ± 1.110	0.000 ± 0.000	0.000 ± 0.000	2.115 ± 0.106	5.025 ± 0.672	3.795 ± 0.134	2.050 ± 0.042	0.000 ± 0.000	0.000 ± 0.000	1.870 ± 0.245	3.160 ± 0.392	2.330 ± 0.392	1.260 ± 0.207	0.000 ± 0.000	0.000 ± 0.000	1.940 ± 1.050	9.120 ± 1.527	7.710 ± 2.203	2.810 ± 0.702	0.000 ± 0.000	0.000 ± 0.000	10.810 ± 0.424	22.855 ± 1.082	15.680 ± 5.374	11.395 ± 1.068	0.000 ± 0.000	0.000 ± 0.000
251	100.000 ± 0.000	100.000 ± 0.000	100.000 ± 0.000	12.500 ± 5.893	0.000 ± 0.000	0.000 ± 0.000	8.645 ± 0.375	5.790 ± 0.042	4.500 ± 0.170	0.000 ± 0.000	0.000 ± 0.000	0.000 ± 0.000	5.110 ± 0.976	3.140 ± 1.301	4.150 ± 0.438	0.000 ± 0.000	0.000 ± 0.000	0.000 ± 0.000	1.930 ± 0.485	1.030 ± 0.200	0.990 ± 0.307	0.000 ± 0.000	0.000 ± 0.000	0.000 ± 0.000	4.550 ± 2.433	3.320 ± 2.634	4.950 ± 3.104	0.000 ± 0.000	0.000 ± 0.000	0.000 ± 0.000	13.755 ± 1.351	8.930 ± 1.344	8.650 ± 0.269	0.000 ± 0.000	0.000 ± 0.000	0.000 ± 0.000
301	91.667 ± 11.785	95.833 ± 5.893	91.667 ± 0.000	70.833 ± 5.893	16.667 ± 23.570	0.000 ± 0.000	7.635 ± 0.544	7.095 ± 0.403	8.395 ± 0.078	3.590 ± 0.071	0.000 ± 0.000	0.000 ± 0.000	2.180 ± 0.651	3.405 ± 0.035	3.000 ± 0.255	2.875 ± 0.191	0.000 ± 0.000	0.000 ± 0.000	2.090 ± 0.649	1.060 ± 0.143	1.270 ± 0.250	0.530 ± 0.095	0.000 ± 0.000	0.000 ± 0.000	8.600 ± 3.907	9.800 ± 2.415	8.510 ± 2.895	1.770 ± 0.397	0.000 ± 0.000	0.000 ± 0.000	9.815 ± 0.106	10.500 ± 0.438	11.395 ± 0.177	6.465 ± 0.120	0.000 ± 0.000	0.000 ± 0.000
351	100.000 ± 0.000	91.667 ± 0.000	75.000 ± 0.000	54.167 ± 17.678	20.833 ± 17.678	0.000 ± 0.000	11.350 ± 7.594	14.850 ± 9.758	16.150 ± 10.918	12.705 ± 11.533	0.000 ± 0.000	0.000 ± 0.000	6.315 ± 3.528	5.065 ± 2.242	3.870 ± 0.820	3.340 ± 0.594	0.000 ± 0.000	0.000 ± 0.000	2.200 ± 0.271	1.190 ± 0.099	1.160 ± 0.151	0.98 ± 0.132	0.000 ± 0.000	0.000 ± 0.000	6.240 ± 2.021	7.650 ± 1.619	7.110 ± 2.708	1.480 ± 0.567	0.000 ± 0.000	0.000 ± 0.000	17.665 ± 4.066	19.915 ± 7.517	20.020 ± 10.097	16.045 ± 10.939	0.000 ± 0.000	0.000 ± 0.000
401	100.000 ± 0.000	100.000 ± 0.000	100.000 ± 0.000	100.000 ± 0.000	100.000 ± 0.000	66.667 ± 0.000	13.945 ± 7.601	24.380 ± 17.409	19.650 ± 13.265	17.185 ± 8.478	12.810 ± 3.380	0.000 ± 0.000	6.180 ± 4.200	10.490 ± 8.174	6.600 ± 4.412	2.240 ± 1.131	0.970 ± 0.099	0.000 ± 0.000	2.380 ± 0.339	1.350 ± 0.108	1.650 ± 0.246	1.200 ± 0.163	0.900 ± 0.133	0.000 ± 0.000	6.260 ± 2.856	9.680 ± 1.588	8.720 ± 2.428	4.500 ± 1.700	1.170 ± 0.406	0.000 ± 0.000	20.125 ± 3.401	34.870 ± 9.235	26.250 ± 8.853	19.425 ± 9.610	13.780 ± 3.479	0.000 ± 0.000
451	100.000 ± 0.000	100.000 ± 0.000	100.000 ± 0.000	95.833 ± 5.893	37.500 ± 5.893	0.000 ± 0.000	11.406 ± 5.807	32.380 ± 2.517	30.588 ± 4.664	22.786 ± 6.384	0.000 ± 0.000	0.000 ± 0.000	6.781 ± 3.014	12.897 ± 1.466	8.834 ± 2.962	2.798 ± 0.300	0.000 ± 0.000	0.000 ± 0.000	2.130 ± 0.231	1.65 ± 0.187	1.567 ± 0.163	1.19 ± 0.129	0.000 ± 0.000	0.000 ± 0.000	8.370 ± 1.627	10.050 ± 0.624	10.860 ± 0.554	4.600 ± 0.631	0.000 ± 0.000	0.000 ± 0.000	18.188 ± 2.793	45.277 ± 3.983	39.422 ± 1.702	25.584 ± 6.084	0.000 ± 0.000	0.000 ± 0.000
501	100.000 ± 0.000	100.000 ± 0.000	100.000 ± 0.000	95.833 ± 5.893	70.833 ± 29.463	8.333 ± 0.000	74.330 ± 5.756	25.930 ± 0.523	26.930 ± 1.061	24.920 ± 0.962	11.610 ± 0.042	0.000 ± 0.000	3.530 ± 0.184	8.280 ± 0.198	5.780 ± 0.339	1.290 ± 0.127	0.565 ± 0.035	0.000 ± 0.000	1.530 ± 0.183	1.590 ± 0.137	1.360 ± 0.052	1.130 ± 0.116	0.940 ± 0.070	0.000 ± 0.000	5.130 ± 2.307	10.150 ± 1.375	9.880 ± 1.213	3.980 ± 0.809	0.770 ± 0.125	0.000 ± 0.000	77.860 ± 5.572	34.210 ± 0.721	32.710 ± 0.721	26.210 ± 0.834	12.175 ± 0.007	0.000 ± 0.000
551	100.000 ± 0.000	100.000 ± 0.000	100.000 ± 0.000	95.833 ± 5.893	91.667 ± 11.785	62.500 ± 5.893	6.815 ± 0.290	35.645 ± 0.559	29.045 ± 0.148	29.385 ± 0.078	12.780 ± 0.990	0.000 ± 0.000	9.575 ± 0.375	13.665 ± 0.177	10.515 ± 0.106	2.625 ± 0.488	0.370 ± 0.071	0.000 ± 0.000	1.510 ± 0.160	2.060 ± 0.280	1.650 ± 0.196	1.150 ± 0.053	0.990 ± 0.137	0.000 ± 0.000	6.260 ± 3.438	10.050 ± 0.433	11.270 ± 0.430	4.900 ± 0.851	0.850 ± 0.127	0.000 ± 0.000	16.390 ± 0.085	49.310 ± 0.735	39.560 ± 0.042	32.010 ± 0.566	13.150 ± 1.061	0.000 ± 0.000
601	100.000 ± 0.000	100.000 ± 0.000	100.000 ± 0.000	100.000 ± 0.000	100.000 ± 0.000	45.833 ± 5.893	31.340 ± 2.291	39.420 ± 2.093	38.185 ± 0.233	27.195 ± 0.276	13.145 ± 0.049	0.000 ± 0.000	11.520 ± 0.792	6.030 ± 0.099	7.600 ± 0.283	2.445 ± 0.021	0.275 ± 0.007	0.000 ± 0.000	2.770 ± 0.236	1.800 ± 0.141	1.790 ± 0.173	1.100 ± 0.082	0.600 ± 0.067	0.000 ± 0.000	7.680 ± 2.063	10.590 ± 1.286	11.300 ± 0.823	4.630 ± 0.615	0.540 ± 0.107	0.000 ± 0.000	42.860 ± 1.499	45.450 ± 1.994	45.785 ± 0.049	29.640 ± 0.297	13.420 ± 0.042	0.000 ± 0.000
651	87.500 ± 5.893	91.667 ± 0.000	91.667 ± 0.000	87.500 ± 5.893	41.667 ± 0.000	8.333 ± 0.000	31.925 ± 2.143	34.450 ± 0.580	22.425 ± 3.627	14.935 ± 1.209	0.000 ± 0.000	0.000 ± 0.000	5.095 ± 0.219	5.800 ± 0.057	3.755 ± 0.134	0.720 ± 0.028	0.000 ± 0.000	0.000 ± 0.000	2.780 ± 0.199	1.640 ± 0.222	0.810 ± 0.099	1.090 ± 0.088	0.000 ± 0.000	0.000 ± 0.000	8.970 ± 1.400	9.480 ± 1.901	10.970 ± 1.272	1.580 ± 0.262	0.000 ± 0.000	0.000 ± 0.000	37.020 ± 2.362	40.250 ± 0.636	26.180 ± 3.493	15.655 ± 1.181	0.000 ± 0.000	0.000 ± 0.000
701	95.833 ± 5.893	87.500 ± 17.678	75.000 ± 11.785	87.500 ± 17.678	66.667 ± 11.785	8.333 ± 11.785	33.510 ± 2.079	42.370 ± 0.467	39.100 ± 0.792	24.430 ± 0.580	0.000 ± 0.000	0.000 ± 0.000	3.130 ± 0.184	2.955 ± 0.035	5.010 ± 0.099	1.235 ± 0.021	0.000 ± 0.000	0.000 ± 0.000	2.940 ± 0.151	2.690 ± 0.269	1.120 ± 0.103	0.940 ± 0.107	0.000 ± 0.000	0.000 ± 0.000	6.730 ± 0.440	10.290 ± 1.692	10.690 ± 0.857	1.830 ± 0.241	0.000 ± 0.000	0.000 ± 0.000	36.640 ± 1.895	45.325 ± 0.502	44.110 ± 0.693	25.665 ± 0.559	0.000 ± 0.000	0.000 ± 0.000
*Data in the table are means (n=18) ± SD.
